# Supplementary material for: The ESCAPE project: Energy-efficient Scalable Algorithms for Weather Prediction at Exascale
Source: Copernicus journal article supplement (doi:10.5194/gmd-2018-304), 2019-01-21
Supplement: Supplementary file [file gmd-2018-304-AC1-supplement.pdf]

# Response to the referee 1 for “The ESCAPE project: Energy-efficient Scalable Algorithms for Weather Prediction at Exascale”

(grey background: text of the reviewer comment, white background: our response)

## Overall impression

The manuscript under consideration was submitted to GMD as a "development and technical paper". The paper topically spans mathematical formulation, numerical integration techniques, parallelization strategies, language-specific aspects of implementation, hardware-specific optimizations, hardware construction, and operational considerations in the context of both global-circulation and limited-area models.

As the main conclusion from the hereby review, I propose to significantly shorten the article (currently 50-pages and 30 figures) and change its type to a "Review and perspective paper" to match the stated intention of the authors to create “the flagship publication for the EU project ESCAPE ... introduce the concept of weather & climate dwarfs and discuss first results in terms of optimization and performance portability”. This path seems to me as much more reasonable than working towards matching the requirements for a “development and technical paper” as defined by GMD guidelines.

The authors aim at: (i) providing a technical report touching upon current-hardwarespecific performance measures, (ii) structuring the work as a research paper, and (iii) presenting a project-promoting overview article. These aims are incompatible in my opinion, and trying to achieve all of them at once results in unclear target audience and an apparent lack of a storyline, despite high potential for strong conclusions to be based on the presented results.

Notwithstanding, I do see a point in publishing such a “perspective” paper with the aim of promoting the project results and giving due credit to participating parties. I expect such a shorter “perspective” paper to achieve a higher impact and I encourage the editorial team to offer this option to the authors.

We would like to thank the reviewer for this advice. Our first submission attempted to describe all the work that was done in the ESCAPE project. We agree that this was too much material and distracted from the main message of the paper. We have significantly shortened the paper and focus now on properly motivating the dwarf concept and to demonstrate this concept by describing the work for one of the dwarfs in detail.

## Code availability

The “Code availability” section on page 42 is derisory. The standard that GMD is fostering among the community is to enable readers and reviewers to reproduce results presented in GMD papers. Here, the reader is only given a link to project website where one may not even find a properly defined software license – just a statement that it "permits free of charge use for educational and/or non-commercial research". The final sentence of the referenced website reads: “If you wish to access any of the implementations, please contact us via the contact form and we will provide further information on the process of obtaining a license”. This stands in clear opposition to the anonymous public access recommendations of GMD. Basing on an educated guess (the most one can anonymously base on given the above), I consider the results presented in the paper as not independently reproducible for reasons including software and hardware availability, as well as lack of availability of the details of the test cases.

As outlined above, a solution would be to move much of the technical details to another publication (a technical report issued by one of the participating institutions – several of those are already cited) and present a “perspective” paper for which GMD does offer an exception in

terms of reproducibility level (see [https://www.geoscientific-model-development.net/about/manuscript\\_types.html](https://www.geoscientific-model-development.net/about/manuscript_types.html)).

The rules in terms of code availability and reproducibility for a development and technical paper are according to the link given by the reviewer the same as for a model description paper. The website of GMD states that "When copyright or licensing restrictions prevent the public release of model code, or in the cases where there is some other good reason for not allowing public access to the code, topical editors must still be given access to the model code. Access must also be granted to the reviewers whilst preserving their anonymity, if this is legally possible." We are happy to offer the editor and the reviewers a license to access the code and test cases used in our work. There is no need to make an exception for this paper in terms of reproducibility.

Nevertheless, the code availability section should contain comprehensive information, and clearly inform about the code availability, not license availability. Please point to repositories, state precisely the licenses or clearly indicate if the code is not publicly available or its reuse is constrained. In case of lack of public availability, GMD requires to state the reasons for it. Please include information for all the software that was essential in obtaining the presented results, including the participating weather prediction models: IFS, ALARO, COSMO-EULAG as well as the described tools such as GRASS, CLAW and GridTools (the <https://github.com/eth-cscs/gridtools> repository linked from the GridTools website does not exist as of time of writing this review).

We have changed the license statement and added information about all software used in the ESCAPE project.

Code availability for hardware-specific tools such as those essential in GPU code development should also be included in the section (see doi:10.1002/2016WR020190 for a recent discussion in the context of hydrological modelling), and in my opinion should also be included in the discussion if a proper "perspective" is to be given. The paper gives an overview of several paths forward in NWP systems development and aims at discussing longer-term strategies. Such discussion calls for mentioning which optimisation strategies are prone to the vendor lock-in threat.

We have added information about the compilers and tools that we used and their versions. As described in the paper we explore vendor specific strategies but we also aim at avoiding vendor lock-in through the use of domain specific languages.

The dwarf nomenclature and technicalities

The authors highlight throughout the paper the concept of separation of concerns in software engineering using the notion of a "dwarf" which the paper introduces in the context of weather and climate models. The reason to introduce a new term is not given. What does the new concept replace (monoliths)? The adopted term is seemingly wrongly attributed (Colella as opposed to Asanović et al.?) and, in my understanding, used in a misleading way. The reason why the 7 dwarfs of Colella, and later the 13 Berkeley dwarfs, the 7 dwarfs of Symbolic Computation, the 13 Parallel Dwarfs (and likely others) were introduced is that the concept they generalize does not easily fit into existing encapsulation nomenclature of: components, frameworks, layers, subsystems, libraries, kernels, modules, services, drivers, plug-ins, controllers, etc. Why dynamical core layers, physics modules and numerical libraries are to be renamed? In principle, why not – let us embrace the introduced notion of Weather & Climate Dwarfs, but please do clarify in the paper the reasons to introduce the new nomenclature and clearly differentiate it from existing solutions.

We referred to Asanović et al. because we could not find a good reference for Colella's presentation. We have revised the motivation section for the dwarf concept and we have added new references.

Moreover, among the community, dwarfs are being defined as computation/communication idioms (e.g., OpenDwarfs project) or (design) patterns of high performance computing (e.g., the mentioned work of Asanović) – is it not misleading to refer to the “components of an Earth system model” borrowing the term that was introduced to define idioms/patterns?

Our goal is to identify patterns in terms of computation and communication that are characteristic for weather and climate models. Each of our dwarfs possesses very characteristic patterns of high performance computing. We have added a column to Table 1 describing the characteristics of each dwarf in terms of communication and computation.

In the conclusions section, the authors note that “... the entire NWP community has a strong interest in pursuing the creation of dwarfs”. Such community-wide initiatives are, in my opinion, only feasible if backed by interface standardization and “liberation” of the software in question. Please do elaborate on how (technically and legally) the reusability of the envisaged community “dwarfs” is to be assured? Furthermore, the dwarfs’ interfaces will determine if the sought after capability of overlapping computations will be feasible.

We have revised the quoted part of the conclusions. We agree from a technical point on clean interfaces, but scientifically disagree that standard interfaces are useful (i.e. plug and play concepts of specific parametrisations or physics and dynamics). In our view standardisation of interfaces in operational NWP software, despite being a very attractive technical concept, it is often detrimental to forecast quality and computational efficiency. It is not the aim of ESCAPE to develop standardised interfaces, even if we explore overlapping concepts. In fact bespoke interfacing may become more important with increasing resolution.

#### Other remarks

- Optimization is the leitmotif of the paper, and is exemplified with detailed results obtained with current hardware and described in zealous detail (a somehow anecdotal example: replace division by constant with multiplication by the reciprocal calculated in advance). Yet at the same time, the paper aims at providing “strategy to evolve weather and climate prediction models to next-generation computing technologies”, exascale is mentioned in the title. Please extend the conclusions section by indicating which of the employed optimizations have the chance to offer “software sustainability” over the years (also in the context of software maintainability tradeoffs), and where, e.g., indirection would be the key to performance (DSLs)?

We have added new results about running the spectral transform dwarf on the supercomputer Summit (currently the fastest supercomputer in the world) and we have added a discussion about the sustainability of the chosen techniques.

- There is an abundance of arcane nomenclature in the paper used without introduction and spanning a broad range of domains, e.g.: “loop fusion optimization”, “generic reduced Gaussian grid”, “parallelogram”, “a perturbative method which determines the (constrained) optical phase”, “Spherical Harmonics TCo639 test case”, “baroclinic instability benchmark”, “weighted line Jacobi method”, “V-cycle configuration”, “major generation and destruction processes, including cloud formation by detrainment from cumulus convection”;

We would like to thank the reviewer for identifying these issues. Many of these statements have been removed by shortening the paper. We have revised the remaining statements.

- There is an imbalance in the level of detail of different sections of the paper, e.g. the well-established MPDATA is introduced with an outline touching upon numerical analysis, while the “created” “global shallow-water model named GRASS” is presented with just a

reference to a pair of submitted papers; there is a two-pagelength introduction to the application of spectral transform methods in NWP, while less than that is devoted to the entire discussion of physics dwarfs; authors do admit that this was intentional (p. 5 last paragraph) for some of the work has not been published elsewhere – this however rather supports publishing it elsewhere than sneaking into an overview paper.

It was never our goal to cover every dwarf in detail. Our goal was to demonstrate our optimisation workflow for a small selection and briefly describe the others. To make this clearer we have now removed the dedicated subsections for the dwarfs which we did not cover in detail. Instead we refer to the corresponding publications in the dwarf table.

- Some of the tools mentioned target Fortran development (e.g., CLAW DSL) while other cater to a wider set of technologies (e.g., Atlas), this is not mentioned explicitly and the reader is left without a clear statement if the proposed directions of development deviate or not from the Fortran ecosystem;

All of the work presented is compatible with Fortran. Even the GPU optimisation is mostly done with OpenACC in Fortran. Gridtools requires currently C++ but we plan to provide Fortran support in future DSLs. We have added a statement about this in the paper.

- The conclusions section contains statements of overly contrasting time horizons: on the one hand, the authors mention “adding a large number of zero operations” what is explained in the text to be caused simply by lack of support for a particular feature in the current version of a third-party library; on the other hand, prerequisites and challenges for subkilometer global simulations are mentioned. Please reconsider what are the main project conclusions worth to be listed in the concluding section and abstract.

We have revised the conclusions section.

- That the great majority of referenced works is [co]authored by the manuscript authors amplifies the feeling of some of the methodology, design or vendor choices being given without a proper context on the alternatives:
  - How representative is the chosen set of models (IFS, ALARO, ALADIN and COSMO-EULAG) among the “competition” and how the considered speedup techniques compare with what has been explored recently (see, e.g., doi:10.1175/BAMS-D-15-00278.1 and references therein)?
  - How the proprietary software and hardware solutions like cuBLAS/cuFFT and NVLink/NVSwitch compare to those provided by other vendors?
  - Overlapping CPU-GPU computation strategy for dynamics/physics has been recently discussed in GMD in context of cloud-resolving simulations (doi:10.5194/gmd-2018-281, e.g. fig. Fig. 1), could the discussion here be supported with references to existing solutions from other domains?
  - mentions of GPU-resident weather forecasting call for citing other recent works (e.g., doi:10.1175/BAMS-D-14-00114.1)
  - What are the alternatives for the used radiation and cloud-physics schemes, are the chosen ones representative of what the community envisages for the mentioned global subkilometer-scale future simulations?
  - Are the CLAW and GridTools DSLs the sole solution available in this context?

We have added some references to the papers mentioned by the reviewer. A comparison with solutions by vendors not involved in the project is outside the scope of this paper. We

are not able and it is not our goal to provide an exhaustive discussion of all available strategies. The goal of the paper is to present the dwarf concept to the weather and climate community and to demonstrate through a few examples how it can be used to enable close collaboration between NWP centres and hardware vendors.

- The word “code” is used in a somehow casual way, e.g. “redesign of the algorithms and codes”, “our work on optimising codes”, “code used for data assimilation”, “models from which the dwarf code originated”; let me suggest to consider employing more cross-domain notions of implementation, software, etc; similar nomenclature issue: restructure vs. refactor;

We followed the reviewers advice, checked every instance of the word "code" and replaced the nomenclature where suitable.

- Please remove any mentions of internal labels within the code – this information is unneeded for a research paper audience: “halo\_exchange subroutine”, “compute\_fluxzdiv”, “this%geom%node2edge\_sign”.

We have removed the internal labels.

- Please limit the use of acronyms/short-forms, and remove those clearly unneeded: PSNC in Fig. 3, EBTI on page 24, GP\_dynamics/SP\_transforms/SI\_solver/RAD in caption of Fig. 5, semi-Lagrange in Fig. 6; Some references are listed with DOI number, some without - please be consistent; FORTRAN/Fortran, TRAP2/Trap2 spelling - please be consistent; Among the affiliations listed, some are given with detailed street addresses, some without - please be consistent.

We have removed the mentioned acronyms and made the text and affiliations consistent. The DOI numbers are given whenever they are available.

- The title of the paper reads “The ESCAPE project: Energy-efficient Scalable Algorithms for Weather Prediction at Exascale”. Exascale is not discussed or defined and barely mentioned only in the conclusions, while the phrase “weather & climate” is used throughout the paper.

We have added recent results on Summit and a discussion which is more targeted at exascale. The title of the paper is the name of the project.

- Statements such as “ECMWF is world leading in terms of track forecast”, “extreme computational capabilities typically required in operational forecast production”, “[IFS code] has been continuously optimized over multiple decades”, “Feedback from the European and international community at our dissemination workshops and at international conferences has shown that this work was well received” are, in my opinion, good candidates for removal when shortening the paper – please avoid promotional language and statements which are not falsifiable; another candidates for removal are numerous vague statements: “most speedup seems to be due to avoiding some of the temporary arrays”, “some more fundamental changes which are more difficult to apply”, “whole cycle might employ some form of smoother/solver”, “has to be wisely chosen according to the cluster hardware”, “we do not know if there will be a clear winner”, “The first results of this effort look promising”.

Many of these statements were removed in the process of shortening the paper as suggested by all reviewers. We have revised the remaining statements.

# Response to the referee 2 for “The ESCAPE project: Energy-efficient Scalable Algorithms for Weather Prediction at Exascale”

(grey background: text of the reviewer comment, white background: our response)

The paper presents a review of the work done in the Escape project. This reviewer is familiar with some of this work and reporting the work done as part of the project is certainly of interest to the community. Unfortunately, the paper is not well written, it is full of mistakes, informal language and confusing or unclear explanations. I have read and documented changes as far as page 17, but this has taken a long time as the paper has not been properly proof read before submission. Referee #1 calls for a substantial revision, and a possible change of paper type, therefore there doesn't seem much point in fully detailing necessary changes beyond this point. A shorter, more focused article as a review and perspective paper would improve the readability and is probably more appropriate for the content.

We would like to thank reviewer 2 for his advice. We have significantly shortened the paper. The main purpose of the paper is to present the dwarf concept to the weather & climate community and to demonstrate it with a detailed example.

I include the detailed points below, which need to be addressed.

Page 2 line 7 Weather prediction (models?)

We have changed the sentence.

Line 20, sentence reads as if heavy precipitation patterns could lead to tropical cyclones, modify

We have revised the introduction.

Line 21 being satisfying “being”

We have changed this sentence.

Intro 1st paragraph is rather clumsy, there are plenty of reasons improved forecasts in general would have economic and societal benefit besides heavy precipitation. The need to improve resolution is given as the main motivation for improved forecasts but then Climate is thrown into the following sentence. Improved resolution versus complexity for improved climate is a matter of debate. There is no mention of current resolutions for the reader to compare 1km. What does global resolution range mean? The last sentence is also confusingly written. This paragraph needs re-writing with proper thought on what is the motivation for improving resolution of weather and climate simulations. There are plenty of justifications.

We have revised the introduction.

Line 27 “guarantee the continued efficiency” is probably a bit strong. “Enable efficient implementations of “ or similar is probably more realistic.

We have made the suggested replacement.

Line 33 “The authors there” is rather informal language.

We have changed this sentence.

Page 3. Line 7 Citation needed to back authors claim that ECMWF is world leading in terms of track forecast. It would be quite odd for a higher resolution forecast to “compromise the accuracy” of a lower resolution, especially as this is the motivation for escape.

We have revised this part of the introduction.

The paragraph on supercomputers is also rather clumsily written and there should be a reference. An obvious one would be “Crossing the Chasm : how to develop weather and climate models for next generation computers?”. Some of the authors of this paper are also authors of the chasm paper. Other references would also be beneficial.

We have revised the introduction and we have added the suggested reference.

Section 2, line 18, The use of “at once” suggests either “immediately” or “at the same time” but “too big” implies neither. This sentence needs re-writing.

We have changed this sentence.

Page 4 The text in figure 1 is far too small to read.

The small text in figure 1 contained only license terms of material that was used to create the figure. We tried to minimise the distraction from the message of the figure by making the text very small. We have now made the text larger to enable everyone to read the text.

Figure 2a “halo’s” has no apostrophe.

We removed this figure from the paper in order to shorten the paper.

Page 5 figure 3 What does the vertical line denote? Line 5 what does “released dwarf” mean?

We have added an explanation of the vertical line to the caption and we have revised the text.

Page 7 line 5 “use 3D var like the “ is too informal language, use for example or e.g.

We have removed this text in order to shorten the paper.

Page 7 line 23 “need” -> “needs”

We have removed this text in order to shorten the paper.

Page 8 Figure 8. The figures are not very well explained. A careful reading of a technical appendix is required and even then it is not clear how they illustrate the point that overlapping

the comms of data transfer is necessary. The main constraint for NWP is time to completion, it is not obvious that the assumptions (necessarily) made to express the scaling in terms of energy are sufficiently universal to infer the point the authors wish to make. Whilst using less energy reduces the cost, the run-time constraint is the primary motivation for NWP. This section needs to be re-worked to describe the performance model and explain how any figures used enable the authors draw the conclusions that they do.

We have removed the cost model in the process of shortening the paper. Just for clarification: all the curves in the plots of the cost model were created under the constraint that the forecast needs to finish within the required runtime. The cost model attempted to answer the question: under the given runtime constraint how much code needs to run on an accelerator to make the use of accelerators financially beneficial. As mentioned in the first version of the paper this cost model requires many assumptions and should only be used as a motivation to port as much of the model as possible to the accelerator. It may not be used as a basis for management decisions.

Page 9 section 3 line 23 Last sentence. What does this mean?

The inverse transform uses first an inverse Legendre transform to compute Fourier coefficients and applies then an FFT to obtain grid point values. The direct transform uses the opposite order: first an FFT to compute Fourier coefficients and then a direct Legendre transform to compute the spectral coefficients. We agree that the term "opposite direction" to describe this difference was misleading. We have revised this part of the text.

Page 10, refers to figure 5 which is on page 11. How are the profiles produced? What machine are they produced from, especially the node count etc would change the profile? The "Anticipated" future are these profiled from data or some performance model? The 1.25km run may well have a different profile on a different machine?

All of these profiles have been measured with the actual model on the Cray XC40 supercomputer of ECMWF. The number of nodes has been chosen such that the model run would be suitable for operational requirements. We agree that different machines will produce different profiles. These profiles are highly relevant for ECMWF because they represent the situation on the machine that is currently used for the operational forecast.

Page 11 refers to figure 7 which appears on page 13, the text "like on the left" is rather informal and inappropriate for a scientific paper.

We have changed the figure accordingly.

Page 12 refers to figure 8 which appears on page 14. In the figure, there is no open diamond referred to in the legend and the caption, the open rectangle referred to in the caption doesn't appear but a dash or line does which isn't referred to in the caption.

The open diamond of the legend is half covered by the filled circle in the plot. The open rectangle of the legend was an oversight and should have been the dash. We have made the filled circle open and changed the colour to make the overlapping points easier to recognise.

Pages 12 and 13 there is a complicated discussion of code changes. This would be illuminated by some code fragments as examples.

We have added code examples in section 3.3.

Figure 10. Page 16 The data points are connected with a line (something spreadsheet application does readily), however, the horizontal axis is Number of GPUs, which is a discrete variable, so a line graph is wrong. Whilst it is not unusual to see such a plot, the authors are not predicting the speed up on 16.5 GPUs so why the line? The plot should be re-drawn appropriately.

We agree with the reviewer that the connecting line between the data points is not supposed to provide a scientific message. We believe that the connecting line makes the plot more readable. We have reduced the thickness of the line by 50% to make it less prominent and we added a statement to the caption describing that the data points were connected with lines purely for the purpose of improving readability.

Page 17 lines 6-15 the paragraph discusses the pack-unpack operation. The sentence sender and receiver share their memory layout as the way they may differ is confusing. How can they share a memory layout if they are different? What was the change that made the performance improvement? Were the pack and unpack scanning memory unnecessarily?

We have replaced "share" with "exchange" in the sense that sender and receiver exchange their own layout among each other. The performance improvement came from reordering the loops for both pack and unpack following the memory layout of the scattered buffer. This optimisation decreased the number of tests (i.e. copy or not copy) and avoids scanning memory multiple times. Scanning the memory multiple times was unnecessary.

The final paragraph on page 17 is a discussion of implementing some of the GPU optimisations on CPUs. Again some code fragments here would be helpful. If the GPU optimisations are too intensive, how can they be used elsewhere for other architectures? The stated goal of ESCAPE is to re-assemble the models from optimised dwarfs. How is this managed? If there are conflicting optimisations how are they resolved? Is single source code possible?

The GPU optimisation required a major redesign of the code which allowed to avoid transpositions of small temporary arrays. This optimisation can be applied as well to the CPU version. As a first step we applied it to a serial version of the spectral transform on CPU which is now used operationally at ECMWF and provides a major speedup as shown in the paper. Applying the same idea to the parallel CPU code requires more work that is planned in the future.

There is of course some risk that different optimisations are conflicting. We have not encountered this issue in ESCAPE so far. In the end we take whichever optimisation gives us the best performance in the full model. We currently have different source codes for CPUs and GPUs. We try to achieve a single source code through the use of the DSL except for highly specialised low level libraries like the spectral transforms.

Figure 11, the "barrier" optimisation is not clearly explained. Again, line plots of noncontinuous variable should be changed.

In the original code, some MPI barriers were present to profile the MPI communications at low level. By disabling these barriers (as allowed and documented in the code), a performance gain was identified. The main lesson learnt by this removal is the following: these barriers imply useless synchronisations which have the following consequences:

1. The application suffers from imbalance (as reported in D3.3 section 4.3.1.3 on a single node run). Thus, adding non mandatory synchronisation via barriers decreased the global performance (as each barrier implies to wait for the slowest process);
2. Moreover, these synchronisations created contention;

3. Last but not least, due to the two first points which change the behaviour of the application, there is a bias in the communications profiling. In other words, this profiling change the application behaviour.

As in the response to the comment on figure 10 we made the line thinner and added a statement to the caption.

## Response to the referee 3 for “The ESCAPE project: Energy-efficient Scalable Algorithms for Weather Prediction at Exascale”

(grey background: text of the reviewer comment, white background: our response)

General comment:

In this manuscript an overview about the achievements in the ESCAPE project is given. The main concept is explained, some of the developments are explained in details and finally some tests are mentioned.

Although I think that this manuscript is a valuable contribution for GMD, I cannot recommend to accept the manuscript in the actual state. The manuscript must be revised in a substantial way before it can be considered again. Therefore I recommend major revision of the manuscript. In the following I will explain my concerns.

Major issues

1. Balance of the manuscript: The manuscript is very long and not really balanced. Some parts are explained in details, as e.g. the development of the MPDATA dwarf, but some parts are just mentioned. Especially for the very shortly explained parts, there are very often references to technical reports, i.e. documentation which is generally not peer reviewed. Although there are some performance tests, there is only one figure showing a test for atmospheric flows, and also this test is only marginally described.

The purpose of the paper is to present the concept of the dwarfs and to describe our work with a few detailed examples. Following the suggestions by reviewers 1 and 2 we have significantly shortened the paper. Having all of the details from the technical reports inside this paper would make it too long and would distract from the main message of the paper. To our knowledge GMD allows references to non peer reviewed technical reports if no peer reviewed reference is available.

The optimisations performed in the ESCAPE project do not affect the accuracy of the result. The figure which showed a comparison between finite volume and spectral transform method was an additional information. We removed this figure in our effort to shorten the paper.

I would recommend to significantly reorganize the manuscript, maybe also considering to split the manuscript into three parts: First, an overview part, where mostly the concept and the new architecture can be explained in a concise way. Second, a model description part, i.e. a detailed description of the different parts of the model, especially of the parts, which are contained in the technical memoranda but not described in peer-reviewed literature. Third, a part dedicated to test cases for atmospheric flows - and maybe also clouds and radiation, since these parts are also included into the model.

The suggested structure of the paper does not fit to the intended purpose of the paper to introduce the dwarf concept and illustrate the workflow with a detailed example. According to the

advice from reviewer 1 and 2 we have significantly shortened the paper with the goal to make the intended message clearer. As stated before the results of test cases for atmospheric flows can be found in the literature given in the references. In this paper we allowed optimisations only if they did not affect the results in any significant way. Under this constraint a description of the optimisation and the performance analysis are sufficient to present our results.

Especially test cases of atmospheric flows would be very interesting, since it is not clear if all the new models represent the atmospheric flow and other atmospheric phenomena in a physically consistent way. Therefore I highly recommend to use well-documented test cases for atmospheric flows, as e.g. Jablonowski & Williamson (2006). It would be interesting to see also tests for clouds and radiation, although I am not really aware of large scale tests, beyond the standard tests as e.g. Weismann & Klemp (1982).

As stated before our work on optimising code does not affect the accuracy of the results. Test cases for the underlying methods can be found in the literature referenced throughout the paper.

2. Selection of the dwarfs: It is not really clear how and why the different dwarfs were chosen. Although I think that this is a well chosen sample of possible models, it should be justified much better. Especially, the choice of the shallow water model is not really clear, because no real results of this model are shown in the manuscript. Therefore, I recommend to describe the choice of the models in a clearer way.

We have revised our conclusions section to make it clearer that we intend this paper to be a starting point and with a hope that the community will join our efforts and identify characteristic patterns in terms of computation and communication (dwarfs) and implement prototypes which can be used to work on optimising the key building blocks of weather & climate models.

Minor issues:

Cost model: The benefit of the cost model is not really clear to me. It is introduced in a comparable length as the dwarfs, but it is not really clear why this is so important for the whole manuscript, justifying a large part in the appendix.

The cost model was meant to illustrate the importance of porting as much of the model to the accelerator as possible. We have removed the cost model in order to shorten the paper as requested by reviewers 1 and 2.
